# Supplementary figures and images for: Fourier transform infrared microspectroscopy reveals that tissue culture conditions affect the macromolecular phenotype of human embryonic stem cells
Source: Royal Society of Chemistry journal article supplement (doi:10.1039/c3an00321c), 2013-01-01

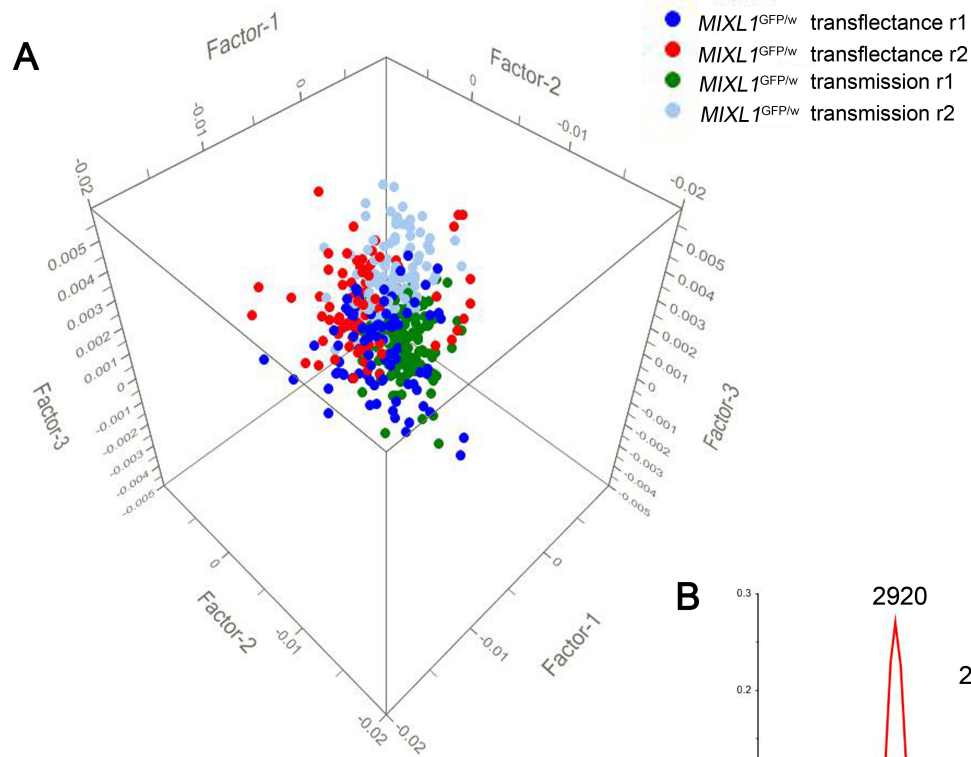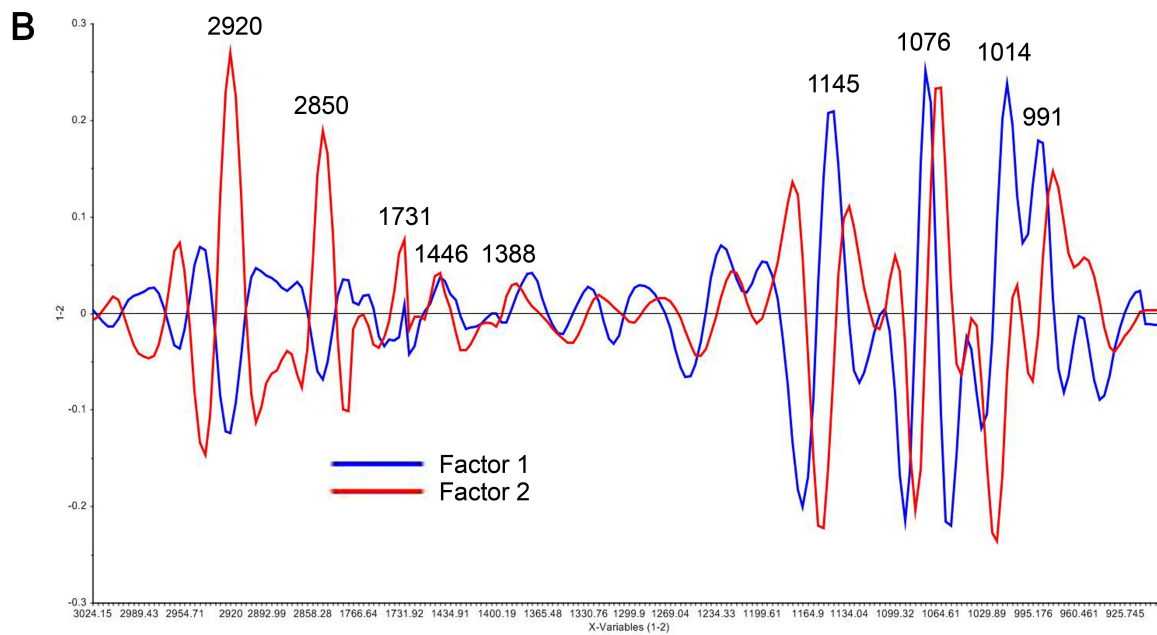

Supplement: c3an00321c.pdf [file c3an00321c.pdf]
